1 **Title:** A 7-member SNP Assay on the iPlex MassARRAY Platform Provides a Rapid and  
2 Affordable Alternative to Typing Major African *Staphylococcus aureus* Types

3 **Running Title:** MassARRAY SNP genotyping of Kenyan clinical *S.aureus*

4 Justin Nyasinga,<sup>b,d</sup> Cecilia Kyany'a,<sup>a</sup> Raphael Okoth,<sup>a</sup> Valerie Oundo,<sup>a</sup> Daniel Matano,<sup>a</sup>  
5 Simon Wacira,<sup>a</sup> Willie Sang,<sup>c</sup> Susan Musembi<sup>b</sup> and Lillian Musila<sup>a#</sup>

6 <sup>a</sup> United States Army Medical Research Directorate - Africa. P.O. Box 621-00606, Nairobi,  
7 Kenya

8 <sup>b</sup> Kenyatta University. P.O. Box 43844-00100, Nairobi, Kenya

9 <sup>c</sup> Kenya Medical Research Institute, P. O. Box 54840-00200, Nairobi, Kenya

10 <sup>d</sup> Technical University of Kenya. P. O. Box 52428- 00200, Nairobi, Kenya

11 <sup>#</sup> Address correspondence to Lillian Musila, [Lillian.Musila@usamru-k.org](mailto:Lillian.Musila@usamru-k.org)

12

13

14

15

16

17

18

19 **Abstract**

20 **Background:** Data on the clonal distribution of *Staphylococcus aureus* in Africa is scanty, partly  
21 due to high costs and long turnaround times imposed by conventional genotyping methods such  
22 as *spa* and multilocus sequence typing (MLST) warranting the need for alternative typing  
23 approaches. This study applied and evaluated the accuracy, cost and time of using iPlex  
24 massARRAY genotyping method on Kenyan staphylococcal isolates.

25 **Methods:** Fifty four clinical *S. aureus* isolates from three counties were characterized using  
26 iPlex massARRAY, *spa* and MLST typing methods. Ten Single Nucleotide Polymorphisms  
27 (SNPs) from the *S. aureus* MLST database were assessed by iPlex massARRAY.

28 **Results:** The iPlex massARRAY assay grouped the isolates into 14 SNP genotypes with 9/10  
29 SNPs interrogated showing high detection rates (average 89%). *spa* and MLST typing revealed  
30 22 *spa* types and 21 STs that displayed unique regional distribution. *spa* type t355 (ST152) was  
31 the dominant type and t2029 and t037 (ST 241) were observed among MRSA strains.  
32 MassARRAY showed 83% and 82% accuracy against *spa* and MLST typing respectively in  
33 isolate classification. Moreover, massARRAY identified all MRSA strains and a novel *spa* type.  
34 MassARRAY had reduced turnaround time (<12 hrs) compared to *spa* (3 days) and MLST (20  
35 days) typing. The iPlex massARRAY cost approximately 18 USD compared to *spa* (30 USD)  
36 and MLST (126 USD) typing based on consumable costs/isolate.

37 **Conclusion:** Upon validation with a larger collection of isolates, iPlex massARRAY could  
38 provide a faster, more affordable and fairly accurate method of resolving African *S.aureus*  
39 isolates especially in large surveillance studies.

40 **Key words:** *S.aureus*, MRSA, typing, iplex massARRAY, *spa*, MLST, Kenya

## 41 INTRODUCTION

42 Antimicrobial resistance in *S. aureus* is a recognized global threat in clinical management of  
43 infections caused by the pathogen [1, 2]. The organism, which may exist asymptotically in  
44 healthy individuals, is capable of causing a wide range of clinical syndromes including skin and  
45 soft tissue infections [3]. In Kenya, infections caused by *S. aureus* including methicillin resistant  
46 strains (MRSA) are widespread [4-6]. Recently, vancomycin resistant strains (VRSA) have been  
47 reported in Kenya's national referral hospital [7].

48 MRSA and VRSA strains are often associated with multi-drug resistance, the consequences of  
49 which include limited therapeutic options, long treatment periods, escalated treatment costs and  
50 significantly higher morbidity and mortality rates [2, 7]. Initially MRSA infections were  
51 associated with hospital settings such as surgical wards and the use of indwelling devices but  
52 community acquired strains (CA-MRSA) surfaced in the 1990s in Australia and North America  
53 and have now spread to all parts of the world [2, 8]. Other MRSA lineages (LA-MRSA) have  
54 been associated with livestock infections.

55 To curb drug resistance, adequate surveillance data regarding the emergence, dissemination and  
56 distribution of drug resistant strains is required. *spa* and MLST typing have become the most  
57 common molecular methods for characterizing the epidemiology of MRSA strains in  
58 surveillance studies [9, 10]. *spa* typing is a sequence based technique that identifies the number  
59 and types of 24 nucleotide repeats in the variable X region of the staphylococcal protein A (*spa*)  
60 gene. The method is moderately discriminatory with interlaboratory repeatability and portability  
61 [10]. *spa* typing is faster and less expensive compared to MLST since it is a single-locus based  
62 technique. However the method presents challenges in delineating particular STs and cannot be

63 reliably applied in outbreak detection [9]. MLST is a sequence based method that indexes  
64 polymorphisms in 400-500bp fragments of seven staphylococcal housekeeping genes. With  
65 moderate discriminatory power, interlaboratory portability and reproducibility the method is  
66 widely applied in surveillance [9]. However, the method is labour intensive, takes long and is  
67 costly with low-throughput given that seven loci are analyzed [9].

68 Particular strains of *S.aureus* tend to localize in certain geographical regions of the world for  
69 example the USA100, USA300 in North America [2] and EMRSA15 and EMRSA16 in the  
70 United Kingdom [11]. In Kenya, only two hospital studies have reported on the molecular  
71 epidemiology of *S.aureus*. In one study, Omuse *et al.*, reported the presence of major global  
72 MRSA clones such as MLST-CC5, 22, 7 and 30 among a heterogeneous collection of *S.aureus*  
73 isolates [6]. In the same study, members of MLST-CC5 such as ST1, ST5, ST8, ST241 were  
74 predominant. The other study conducted by Aiken *et al.*, reported *spa* type t037-ST239 as the  
75 dominant strain among MRSA isolates recovered from inpatients in a mid-level hospital [5].  
76 Generally, data on the clonal diversity and distribution of MRSA in Africa is scanty warranting  
77 further studies [1, 6, 12].

78 High costs, long result turnaround times, technical complexity and lack of technical expertise  
79 have impeded the adoption of conventional typing methods for surveillance studies especially in  
80 resource-limited settings such as Africa [1, 6, 12]. In recent years, SNP genotyping has been  
81 proposed as a robust, efficient and low cost approach to epidemiological characterization of  
82 *S.aureus* [9, 13]. Robertson *et al.*, identified and interrogated by real-time PCR, seven  
83 informative SNPs that could resolve Australian MRSA strains into groups that reflected the  
84 population structure of the organism [14]. Syrmis *et al.*, reported 98% accuracy and reduced  
85 assay costs when a multiplexed SNP-based assay on the iplex massARRAY platform was

86 compared to real-time PCR SNP genotyping of a collection of Australian *S.aureus* [13]. Despite  
87 the potential of iPlex massARRAY as a low cost, rapid and high throughput method for typing  
88 staphylococcal isolates, the technique has not been extensively evaluated against conventional  
89 methods like *spa* and MLST typing and against *S. aureus* clones from Africa whose  
90 epidemiology has been thought to be unique [12].

91 In this study, results of a multiplexed iPlex massARRAY assay for a collection of Kenyan  
92 *S.aureus* isolates are reported. In addition, comparisons between iPlex massARRAY, *spa* and  
93 MLST typing with regard to discriminatory power, assay turnaround times and reagent and  
94 consumable costs are presented.

## 95 **MATERIALS AND METHODS**

96 **Study population and isolates.** This study analyzed 54 archived clinical isolates collected  
97 between 2015 and 2016 from a recruited patient population of 221 persons. The isolates were  
98 part of an ongoing antimicrobial resistance surveillance project covering hospitals in three  
99 geographical regions of Kenya. The 54 isolates included 16 isolates from Nairobi County and 19  
100 isolates each from Kisumu and Kericho Counties. Blood, urine, pus and swabs from skin and  
101 soft tissue infections and the throat were sampled from consenting in- and out- patients of all  
102 ages visiting the participating hospitals. Standard microbiological techniques were used for  
103 culture, isolation and identification of *S.aureus*. Isolate identities were further confirmed by  
104 conventional PCR for the *femA* gene. Antimicrobial susceptibility testing was performed using  
105 both Siemens MicroScan WalkAway 96 plus® (Siemens Healthcare Diagnostics, Inc., New  
106 York, USA) and Kirby Bauer disc diffusion methods. About 87% (47/54) of the isolates were  
107 associated with community acquired infections. Skin and soft tissue infections (SSTIs) accounted

108 for 94% (51/54) of the infections while urine specimens represented 5.5% (3/54). Eleven percent  
109 (6/54) of the isolates were classified as MRSA. All MRSA isolates were *mecA*-positive and 4/6  
110 had SCC*mecIV* genotype. All the isolates were preserved as glycerol stocks at -80°C.

111 **Ethical Approval.** This study was reviewed and approved by the Kenya Medical Research  
112 Institute (KEMRI) Scientific and Ethics Review Unit (KEMRI/SERU/CCR/0061/3448) and by  
113 the WRAIR IRB (WRAIR #2089A).

114 **DNA extraction.** All clinical isolates and four reference isolates [ATCC 43300, ATCC CO-34,  
115 ATCC 25213 and ATCC 25923 ([www.beiresources.org](http://www.beiresources.org))] were sub-cultured by streaking a  
116 loopful of inoculum on Muller Hinton agar plates (Sigma-Aldrich, Missouri, USA) and  
117 incubating for 18-24hrs at 37°C. The ZR/Fungal/ Bacterial DNA MiniPrep kit (Zymo Research,  
118 California, USA) was used for extraction following manufacturer's instructions with two  
119 modifications: The processing time for the cell disruption step was set at 10 mins and DNA was  
120 eluted with 60µl of elution buffer. DNA was quantified using Qubit DsDNA quantification kit  
121 (Thermo Fisher Scientific, Massachusetts, USA). For iPlex massARRAY assays, DNA  
122 concentrations were normalized to 10ng/µl. All DNA samples were stored at -20°C.

123 **PCR amplification of the *spa* gene.** Published primers were used to amplify the X region of the  
124 *spa* gene [15]. Each 25 µl PCR reaction mix included 10.5 µl of sterile nuclease free water, 12.5  
125 µl of Dream Taq mix (Thermo Fisher Scientific, Massachusetts, USA), 0.5 µl (10pmol) of both  
126 the forward and reverse primers with 1 µl (approximately 50ng) of template DNA. Cycling was  
127 performed in a GeneAmp 9700 PCR System (Applied Biosystems, California, USA) with the  
128 following conditions: Initial denaturation at 95°C for 5 mins, and 35 cycles of denaturation at  
129 95°C for 45s, primer annealing at 60°C for 30s, extension at 72°C for 90s followed by a final

130 extension at 72<sup>0</sup>C for 10 mins. Amplification products were resolved on a 1.5% agarose in 1X  
131 Tris Acetate EDTA buffer (Sigma-Aldrich, Missouri, USA) for 60 mins at 95V and visualized  
132 with EZ Vision DNA stain (Amresco Inc. Ohio, USA) using a UV- transilluminator (UVP LLC,  
133 California, USA).

134 **PCR amplification of MLST loci.** Published primers were used to amplify the MLST loci [16].  
135 Each 25 µl reaction comprised 10.5 µl of sterile nuclease free water, 12.5 µl of Dream Taq mix  
136 (Thermo Fisher Scientific, Massachusetts, USA), 0.5 µl (10pmol) of both forward and reverse  
137 primers with 1 µl of template DNA (approximately 50ng). Thermocycler conditions were set as:  
138 Initial denaturation at 95<sup>0</sup>C for 3 mins and 35 cycles of strand denaturation at 95<sup>0</sup>C for 30s,  
139 primer annealing at 55<sup>0</sup>C for 30s and extension at 72<sup>0</sup>C for 60s and a final extension at 72<sup>0</sup>C for  
140 10 mins. The amplicons were resolved and visualized as described above for the *spa* gene.

141 **Sanger sequencing of *spa* and MLST amplicons.** *spa* and MLST amplicons were purified  
142 using the DNA Clean & Concentrator kit (Zymo Research, California, USA) following  
143 manufacturer instructions with a final elution volume of 30 µl. Both forward and reverse strands  
144 were sequenced. Each reaction contained 4 µl of sterile distilled water, 2 µl of 5X Big Dye buffer  
145 (Applied Biosystems, California, USA), 1 µl of the PCR primers (4 µM), 1 µl of Big Dye  
146 terminator mix (Applied Biosystems, California, USA) and 4 µl of amplicon DNA. Cycle  
147 sequencing was performed on an ABI 9700 thermocycler with cycling conditions set as: 94<sup>0</sup>C for  
148 5 mins followed by 30 cycles of 94<sup>0</sup>C for 15s, 55<sup>0</sup>C for 30s and 68<sup>0</sup>C for 2 mins and 30s and a  
149 final extension of 68<sup>0</sup>C for 3 mins. Sequencing fragments were purified using Sephadex G50  
150 resin (Sigma-Aldrich, Missouri, USA) before loading on the Applied Biosystems Genetic  
151 Analyzer 3500.

152 **Iplex massARRAY assays for MLST SNPs.** The 10 MLST SNPs used in this study have been  
153 published before [13]. Nine of the 10 MLST SNPs assayed were bi-allelic while one (arcC210)  
154 was tri-allelic. Amplification and extension primers were designed using Agena Bioscience  
155 Assay Design Suite Version 2.0 (Agena Bioscience, Hamburg, Germany). The sequences used to  
156 design primers for primary amplification and extension PCR reactions were downloaded from  
157 the staphylococcal MLST database, <http://www.mlst.net>, 20<sup>th</sup> June, 2016 [16] and are shown in  
158 Table 1. All primary PCR primers had a 10-nucleotide tag (**ACGTTGGATG**) on the 5' end to  
159 exclude them from the 4500-9000 Da mass range of MALDI-TOF MS detection. The primary  
160 multiplex PCR reactions were run on a GeneAmp 9700 PCR machine (Applied Biosystems,  
161 California, USA). Each reaction mix contained 1x PCR Buffer, 0.1  $\mu$ M of forward and reverse  
162 primers, 4 mM MgCl<sub>2</sub>, 500  $\mu$ M dNTP mix, 0.5 units of Taq polymerase and 10 ng of DNA  
163 template. PCR conditions were set as follows: Initial denaturation at 95<sup>0</sup>C for 2 minutes, 25  
164 cycles of 95<sup>0</sup>C for 30s, 56<sup>0</sup>C for 30s, and 72<sup>0</sup>C for 60s followed by a final extension at 72<sup>0</sup>C for 5  
165 mins.

166 Shrimp alkaline phosphatase (SAP) enzyme was used to dephosphorylate unused dNTPs from  
167 the primary PCR reaction before the second allele-specific primer extension PCR. For allele  
168 specific PCR reactions, 2  $\mu$ l of the reconstituted extension primer cocktail was added to each  
169 reaction well and the following conditions were set: Initial denaturation at 94<sup>0</sup>C for 30s, 40  
170 cycles of one step at 94<sup>0</sup>C for 5s with five sub cycles of 52<sup>0</sup>C for 5s and 80<sup>0</sup>C for 5s, and a final  
171 extension at 72<sup>0</sup>C for 3 minutes. The sequences and masses for unextended primers (UEPs) and  
172 extension products for each SNP and SNP allele are shown in Table 2. Extension products were  
173 conditioned using a resin after which 10 nl was dispensed to a 96-well spectroCHIP using the  
174 MassARRAY Nanodispenser RS1000 (Agena Bioscience, Hamburg, Germany).



175 **Costing and time comparisons.** Reagent and consumable costs per isolate for *spa* and MLST  
176 typing were estimated for various steps such as DNA extraction, primer sequences, PCR  
177 amplification, gel electrophoresis, PCR clean up, cycle sequencing, fragment purification and  
178 fragment analysis. For iPlex massARRAY, costs for primer sequences, primary and allele-  
179 specific PCR amplifications, SAP treatment, sample conditioning and liquid transfer to  
180 spectrochips were estimated. Time durations to result generation for the three methods after  
181 DNA extraction were also compared.

182 **Data analysis.** Raw sequencing chromatograms were examined using Chromas Version 2.6.2  
183 (Technelysium Pty) before consensus sequences were created using BioEdit Sequence  
184 Alignment Editor Version 7.2.5 [17]. *spa* types were assigned using the online *spa* Type  
185 Finder/Identifier Software, [spatyper.fortinbras.us/](http://spatyper.fortinbras.us/) (Fortinbras Research). *spa* types were further  
186 confirmed using the Ridom *spa* Server, [spaserver.ridom.de](http://spaserver.ridom.de) (Ridom GmbH, Würzburg,  
187 Germany) [18]. For MLST loci, consensus sequences were aligned using the online alignment  
188 tool, MAFFT Version 7 <https://mafft.cbrc.jp/alignment/server/>. Sequence types were assigned  
189 on the MLST database [www.mlst.net](http://www.mlst.net) [16] using the “Exact or Nearest Match” option. The  
190 SpectroAcquire program was used for data acquisition on the MassARRAY Compact Analyzer  
191 (Agena Bioscience, Hamburg, Germany) and detection parameters were set at ten laser shots per  
192 raster position with a threshold of five good spectra per sample pad.

193 **Data availability.** Raw chromatograms for *spa* and MLST typing as well as data output from the  
194 MALDI-TOF MS will be made available upon request.

195

196

## 197 **RESULTS**

198 **Distribution of *spa* and MLST types.** *spa* and MLST typing of the collection of isolates yielded  
199 congruent results. *spa* and MLST typing showed 22 *spa* types and 21 STs respectively. The  
200 isolates displayed considerable heterogeneity with 16/22 *spa* types and 13/21 sequence types  
201 being represented by only one isolate. The three regions showed unique genetic fingerprints with  
202 minimal overlaps in isolate composition. Only t355 (ST152) was observed across the three  
203 regions with 18 *spa* types and 18 STs associating with specific regions. Kericho region showed  
204 greater diversity (12 *spa* types and 10 STs) followed by Kisumu (10 *spa* types and 8 STs) and  
205 Nairobi (5 *spa* types and 7 STs). Two novel *spa* types t17841 and t17826 were reported and were  
206 both associated with MSSA isolates. Despite the heterogeneity, t355 (ST152), t064 (ST8), t005  
207 (ST22), t2029/t037 (ST241) seemed to dominate. The six MRSA isolates were represented by  
208 types: [t2029 (ST241) n=1, t037 (ST241) n=3, t355 (ST152) n=1 and t007 (ST39) n=1].

209 **Typability and variability of the MLST SNPs.** Table 3 summarizes the characteristics of the  
210 10 SNPs analyzed. Nine of the 10 SNPs interrogated were highly typeable with SNP call rates  
211 (number of isolates in which a particular SNP was identified as a proportion of the total number  
212 of isolates tested) that ranged from 81% - 98.3% (average 89%). One SNP, pta294, was  
213 identified in only one isolate and was subsequently excluded from the analyses. Eight of the  
214 remaining SNPs were highly variable with allele frequencies (number of isolates positive for a  
215 given SNP allele as a proportion of all isolates in which that SNP was identified) ranging from  
216 53% (arcC162) to 84.6% (yqil333).

217 **Iplex massARRAY SNP genotypes.** The combination of nine SNPs for each isolate was used to  
218 generate SNP genotypes. Different SNP combinations were created with the aim of finding the

219 smallest number of SNPs with the highest resolution (Data not shown). A 7-member SNP  
220 classification that excluded both *aroE252* and *tpi36* (**arcC162, arcC210, aroE132, gmk129, tpi**  
221 **241, tpi 243** and **yqil333**) achieved a similar resolution to that of the 9-member SNP profiles.  
222 The assay grouped 44/54 isolates into 14 different SNP genotypes. Table 4 shows the regional  
223 distribution of various SNP genotypes. In Kericho, nine SNP genotypes were observed among  
224 the isolates while Kisumu and Nairobi isolates showed 8 and 4 SNP genotypes respectively. The  
225 assay successfully typed 11/16, 16/19 and 17/19 isolates from Nairobi, Kericho and Kisumu  
226 respectively while 10 isolates did not have complete SNP profiles. The classifications achieved  
227 by iPlex massARRAY reflected the heterogeneity and regional distribution patterns revealed by  
228 *spa* and MLST typing.

229 The 14 SNP genotypes were compared with corresponding *spa* and MLST sequence types for all  
230 isolates. Iplex massARRAY showed 83% (34/41) accuracy against *spa* typing and 82% (32/39)  
231 against MLST typing in genotype assignment. The SNP genotype **TTACGAC** corresponded to a  
232 novel *spa* type t17841 and SNP genotype **TCACGGT** corresponded to another novel *spa* repeat  
233 sequence yet to be assigned a *spa* type. iPlex massARRAY identified all MRSA isolates in this  
234 collection. One MRSA was of the **ATACGGT** genotype which corresponded to t355. t037  
235 which was the *spa* type of 3 MRSA and t2029 (1 MRSA) were represented by the **ATACGAT**  
236 genotype. **ACGTAGT** corresponded to t007 (one MRSA).

237 Three discrepancies involving iplex massARRAY were observed: SNP genotype **TCACGGC**  
238 could not distinguish between t3772 and t13194 (ST 25 and ST80). SNP genotype **TTGTGGT**  
239 could not distinguish between t314/ and t272 (ST121 and 152). Lastly, **TCACGAT** could not  
240 distinguish between t084 and t131 (ST 15 and ST1290). Discrepancies involving *spa* types

241 t318/t021 and t037/t2029 were considered minor as such isolates are grouped as members of  
242 ST30 and ST241 respectively by MLST (Table 5).

243 **Turnaround time, reagent and consumable costs per isolate.** The iPlex massARRAY assay  
244 took approximately 1 day compared to *spa* and MLST typing which took approximately 3 and 20  
245 days respectively (Table 6). The reagent and consumable cost of analyzing an isolate for  
246 massARRAY was approximately 18 USD compared to *spa* (30 USD/isolate) and MLST (126  
247 USD/isolate) typing for the collection of isolates analyzed (Data not shown).

## 248 **DISCUSSION**

249 Seven MLST SNPs identified 14 unique genotypes and reflected the heterogeneity and  
250 distribution depicted by *spa*/MLST typing of a collection of 54 Kenyan isolates. iPlex  
251 massARRAY identified all the MRSA isolates used in this study as well as detecting a novel *spa*  
252 type. The assay showed comparable resolution to *spa* and MLST typing (83% and 82%  
253 respectively). The combination of 7 SNPs achieved similar resolution to that of 9 SNPs initially  
254 assayed. Coincidentally, the seven SNPs matched those originally described by Robertson *et al*  
255 that could resolve major Australian MRSA strains [14]. A technique that can identify circulating  
256 strains within a population using the smallest number of variable loci would offer the benefits of  
257 reduced costs and turnaround time. The isolate types identified by massARRAY such as ST152,  
258 ST5, ST8, ST15, ST30 and ST241 have been reported in other African countries such as  
259 Cameroon, Madagascar, Morocco, Niger, and Senegal [19] and Ghana [20] thereby highlighting  
260 the potential of this assay to be universally applied in the African context.

261 In some instances the assay could not distinguish between two or more *spa*/MLST types, an  
262 observation noted by others [14, 21]. The three SNP profiles that could not distinguish certain

263 *spa*/MLST types did not belong to major circulating *spa*/MLST types in the study as 5/6 affected  
264 groups were represented by one isolate each, none of which was an MRSA strain. Previously, it  
265 has been suggested that increasing the number of SNPs from 7 to 14 can resolve minor *S. aureus*  
266 clones [21]. However, 2 of the 10 SNPs (*aroE252* and *tpi36*) assayed did not prove useful in  
267 increasing the resolution of the assay while one (*pta294* was poorly typeable). While the  
268 potential of a larger SNP set to resolve minor clones is recognized, a different set of SNPs in  
269 addition to the seven identified here may be required.

270 MassARRAY demonstrated great capabilities for increased speed and throughput. After  
271 optimization, the assay took <12 hours from DNA amplification to generate results for the  
272 isolates analyzed in comparison to *spa* (3 days) and MLST typing (20 days). The technique  
273 offers greater multiplexing capabilities that can upon effective assay design be used to detect  
274 other genes to answer clinically important questions about a pathogen such as virulence and  
275 resistance [13] a feature that is absent both in *spa* and MLST typing methods.

276 MassARRAY showed considerable reduction in assay costs in comparison to *spa* and MLST  
277 typing. Estimated reagent and consumable cost/isolate was 18USD compared to *spa* and MLST  
278 typing (30USD and 126 USD respectively). In one study, when the iplex massARRAY assay  
279 costs were compared to SYBR green real time PCR, there was a 60% reduction in reagent costs  
280 [13]. Trembizki *et al.* noted an approximately 30% reduction in cost compared to performing a  
281 full MLST analysis [22]. The fairly high initial costs for the massARRAY system are justified by  
282 the short turnaround times, multiplexing, automation and throughput capabilities which can  
283 support multiple large scale studies concurrently thereby contributing to massive amounts of  
284 data.

285 As the massARRAY technology is increasingly being adopted, studies utilizing its application in  
286 bacterial genotyping are being reported. Trembizki *et al* developed, applied and validated a 14-  
287 member SNP assay on the massARRAY platform for genetic characterization of *Neisseria*  
288 *gonorrhoea* isolates in Australia [22]. Subsequently, the assay was used for a large scale AMR  
289 surveillance study of *Neisseria gonorrhoea* [23].

290 The assay is promising particularly in long-term surveillance studies where it is impractical to  
291 perform *spa* and MLST typing on the hundreds to thousands of isolates recovered from such  
292 studies. An ideal approach would be to perform an iPlex massARRAY analysis as a first-step  
293 molecular screen to identify isolates with unusual SNP genotypes or those with which discrepant  
294 results are recognized. A full *spa* or ST determination could then follow to definitively resolve  
295 such isolates.

296 There were instances for example with pta294 where particular SNPs could not be called. A  
297 possible explanation for this could be sequence variation in the primer targets for the primary  
298 PCR reactions, an observation that has been noted elsewhere [13, 22]. The quality of DNA can  
299 potentially affect the success of the assay [22]. However, the DNA used for these experiments  
300 was of high quality as extraction was done using a commercial kit and DNA concentrations were  
301 measured and normalized.

302 The lack of a database for MLST SNPs that can be used for matching particular SNP profiles to  
303 known STs or *spa* types [22] is a major limitation. This is partly due to the fact that assays on  
304 this platform have not been rigorously evaluated against known STs/*spa* types from an  
305 international collection of isolates. However, with increased validation and adoption, it should be

306 possible to have an online MLST-style platform where SNPs can be submitted for inter-  
307 laboratory comparability of data.

308 Compelling epidemiological conclusions cannot be drawn as the study analyzed a modest  
309 collection of 54 isolates, a small proportion of which constituted MRSA isolates. A larger  
310 collection of isolates from diverse regions and clinical syndromes would give not only a reliable  
311 reflection of the epidemiology of MRSA in Kenya but also serve to highlight the utility of iplex  
312 massARRAY for surveillance.

313 In conclusion, seven SNPs derived from the MLST loci provided comparable discriminatory  
314 power for resolving a heterogeneous and regionally unique collection of Kenyan clinical  
315 *S.aureus* isolates including MRSA strains. The iplex massARRAY demonstrated advantages of  
316 reduced turnaround time and assay costs in relation to two conventional typing methods. With  
317 increased validation, the assay should serve as a complement to existing typing methods  
318 especially in staphylococcal AMR surveillance studies.

319 **Conflict of Interest:** The authors declare no conflict of interest.

320 **Acknowledgements:** This work was funded by the Armed Forces Health Surveillance Branch  
321 (AFHSB) and its Global Emerging Infections Surveillance (GEIS) Section. PROMIS ID:  
322 20160270153 FY17. JN received a student research grant from the Kenya National Research  
323 Fund. We acknowledge the use of the *S. aureus* MLST database which is located at Imperial  
324 College London and is funded by the Wellcome Trust. This publication made use of the *spa*  
325 typing website (<http://www.spaserver.ridom.de/>) that is developed by Ridom GmbH and curated  
326 by SeqNet.org (<http://www.SeqNet.org/>). We appreciate technical support from Luise Ingasia

327 and the MDR Laboratory. We thank the study participants for the AMR Surveillance Project.

328 This article has been published with permission from the Director, KEMRI.

329 **Disclaimer:** Material has been reviewed by the Walter Reed Army Institute of Research. There  
330 is no objection to its presentation and/or publication. The opinions or assertions contained herein  
331 are the private views of the author, and are not to be construed as official, or as reflecting true  
332 views of the Department of the Army or the Department of Defense. The investigators have  
333 adhered to the policies for protection of human subjects as prescribed in AR 70-25.

334 **Author contributions:** **JN:** Study design, strain typing, data analysis and manuscript write up  
335 and review; **LM:** Study design, data analysis, manuscript write up, review and proof reading;  
336 **CK:** DNA extraction, strain typing and manuscript review; **RO:** MassARRAY assay design and  
337 execution, data analysis and manuscript review. **VO, DM** and **SW** performed bacterial culture  
338 and identification, AST testing and manuscript review; **WS** and **SM** offered technical  
339 consultation and manuscript review.

340

341

342

343

344

345

346



347 **References**

- 348 1. Abdulgader SM, Shittu AO, Nicol MP, Kaba M (2015). *Molecular epidemiology of*  
349 *Methicillin-resistant Staphylococcus aureus in Africa: a systematic review*. Front  
350 Microbiol **6**: p. 348.
- 351 2. DeLeo FR, Otto M, Kreiswirth BN, Chambers HF (2010). *Community-associated*  
352 *meticillin-resistant Staphylococcus aureus*. Lancet **375**(9725): p. 1557-1568.
- 353 3. Loughman JA, Fritz SA, Storch GA, Hunstad DA (2009). *Virulence gene expression in*  
354 *human community-acquired Staphylococcus aureus infection*. J Infect Dis **199**(3): p. 294-  
355 301.
- 356 4. Akoru C, Kuremu RT, Ndege SK, Obala A, Smith JW, Bartlett M (2016). *Prevalence*  
357 *and Anti-Microbial Susceptibility of Methicillin Resistant Staphylococcus aureus at Moi*  
358 *Teaching and Referral Hospital Eldoret*. Open J Med Microbiol **6**(01): p. 9.
- 359 5. Aiken AM, Mutuku IM, Sabat AJ, Akkerboom V, Mwangi J, Scott JA, Morpeth SC,  
360 Friedrich AW, Grundmann H (2014). *Carriage of Staphylococcus aureus in Thika Level*  
361 *5 Hospital, Kenya: a cross-sectional study*. Antimicrob Resist Infect Control **3**(1): p. 22.
- 362 6. Omuse G, Van Zyl KN, Hoek K, Abdulgader S, Kariuki S, Whitelaw A, Revathi G  
363 (2016). *Molecular characterization of Staphylococcus aureus isolates from various*  
364 *healthcare institutions in Nairobi, Kenya: a cross sectional study*. Ann Clin Microbiol  
365 Antimicrob **15**(1): p. 51.
- 366 7. Gitau W, Masika M, Musyoki M, Museve B, Mutwiri T (2018). *Antimicrobial*  
367 *susceptibility pattern of Staphylococcus aureus isolates from clinical specimens at*  
368 *Kenyatta National Hospital*. BMC Res Notes **11**(1): p. 226.

- 369 8. Chambers HF, DeLeo FR. (2009). *Waves of resistance: Staphylococcus aureus in the*  
370 *antibiotic era*. Nat Rev Microbio **7**(9): p. 629.
- 371 9. Struelens M, Hawkey PM, French G, Witte W, Tacconelli E (2009). *Laboratory tools*  
372 *and strategies for methicillin-resistant Staphylococcus aureus screening, surveillance*  
373 *and typing: state of the art and unmet needs*. Clin Microbiol Infect **15**(2): p. 112-119.
- 374 10. O'Hara FP, Suaya JA, Ray GT, Baxter R, Brown ML, Mera RM, Close NM, Thomas E,  
375 Amrine-Madsen H (2016). *spa Typing and multilocus sequence typing show comparable*  
376 *performance in a macroepidemiologic study of Staphylococcus aureus in the United*  
377 *States*. Microb Drug Resist. **22**(1): p. 88-96.
- 378 11. Holmes A, McAllister G, McAdam P, Choi SH, Girvan K, Robb A, Edwards G,  
379 Templeton K, Fitzgerald J (2014). *Genome-wide single nucleotide polymorphism-based*  
380 *assay for high-resolution epidemiological analysis of the methicillin-resistant*  
381 *Staphylococcus aureus hospital clone EMRSA-15*. Clin Microbiol Infect **20**(2): p. O124-  
382 O131.
- 383 12. Schaumburg F, Alabi A, Peters G, Becker K (2014). *New epidemiology of*  
384 *Staphylococcus aureus infection in Africa*. Clin Microbiol Infect **20**(7): p. 589-596.
- 385 13. Sirmis MW, Moser RJ, Whiley DM, Vaska V, Coombs GW, Nissen MD, Sloots TP,  
386 Nimmo GR (2011). *Comparison of a multiplexed MassARRAY system with real-time*  
387 *allele-specific PCR technology for genotyping of methicillin-resistant Staphylococcus*  
388 *aureus*. Clin Microbiol Infect **17**(12): p. 1804-1810.
- 389 14. Robertson GA, Thiruvengataswamy V, Shilling H, Price EP, Huygens F, Henskens FA,  
390 Giffard PM (2004). *Identification and interrogation of highly informative single*

- 391 *nucleotide polymorphism sets defined by bacterial multilocus sequence typing databases.*  
392 J Med Microbiol **53**(1): p. 35-45.
- 393 15. Shopsis B, Gomez M, Montgomery SO, Smith DH, Waddington M, Dodge DE, Bost  
394 DA, Riehman M, Naidich S, Kreiswirth BN (1999). *Evaluation of protein A gene*  
395 *polymorphic region DNA sequencing for typing of Staphylococcus aureus strains.* J Clin  
396 microbiol **37**(11): p. 3556-3563.
- 397 16. Enright MC, Day NP, Davies CE, Peacock SJ, Spratt BG (2000). *Multilocus sequence*  
398 *typing for characterization of methicillin-resistant and methicillin-susceptible clones of*  
399 *Staphylococcus aureus.* J Clin microbiol **38**(3): p. 1008-1015.
- 400 17. Hall TA (1999). *BioEdit: a user-friendly biological sequence alignment editor and*  
401 *analysis program for Windows 95/98/NT in Nucleic acids symposium series.* [London]:  
402 Information Retrieval Ltd., c1979-c2000.
- 403 18. Harmsen D, Claus H, Witte W, Rothgänger J, Claus H, Turnwald D, Vogel U (2003).  
404 *Typing of methicillin-resistant Staphylococcus aureus in a university hospital setting by*  
405 *using novel software for spa repeat determination and database management.* J Clin  
406 microbiol **41**(12): p. 5442-5448.
- 407 19. Breurec S, Fall C, Pouillot R, Boisier P, Brisse S, Diene-Sarr F, Djibo S, Etienne J,  
408 Fonkoua MC, Perrier-Gros-Claude, JD, Ramarokoto CE, Randrianirina F, Thiberge JM,  
409 Zriouil SB, Working Group on *Staphylococcus aureus* Infections, Garin B, Laurent F  
410 (2011). *Epidemiology of methicillin-susceptible Staphylococcus aureus lineages in five*  
411 *major African towns: high prevalence of Panton-Valentine leukocidin genes.* Clin  
412 Microbiol Infect **17**(4): p. 633-639.

- 413 20. Egyir B, Guardabassi L, Sørum M, Nielsen SS, Kolekang A, Frimpong E, Addo KK,  
414 Newman MJ, Larsen AR (2014). *Molecular epidemiology and antimicrobial*  
415 *susceptibility of clinical Staphylococcus aureus from healthcare institutions in Ghana.*  
416 PLoS One **9**(2): p. e89716.
- 417 21. Stephens AJ, Huygens F, Inman-Bamber J, Price EP, Nimmo GR, Schooneveldt J,  
418 Munckhof W, Giffard PM (2006). *Methicillin-resistant Staphylococcus aureus*  
419 *genotyping using a small set of polymorphisms.* J Med Microbiol **55**(1): p. 43-51.
- 420 22. Trembizki E, Smith H, Lahra MM, Chen M, Donovan B, Fairley CK, Guy R, Kaldor J,  
421 Regan D, Ward J, Nissen MD, Sloots TP, Whiley DM (2014). *High-throughput*  
422 *informative single nucleotide polymorphism-based typing of Neisseria gonorrhoeae using*  
423 *the Sequenom MassARRAY iPLEX platform.* J Antimicrob Chemother, **69**(6): p. 1526-  
424 1532.
- 425 23. Whiley DM, Trembizki E, Buckley C, Freeman K, Baird RW, Beaman M, Chen M,  
426 Donovan B, Kundu RL, Fairley CK, Guy R, Hogan T, Kaldor JM, Karimi M, Limnios A,  
427 Regan DG, Ryder N, Su JY, Ward J, Lahra MM (2017). *Molecular antimicrobial*  
428 *resistance surveillance for Neisseria gonorrhoeae, Northern Territory, Australia.* Emerg  
429 Infect Dis **23**(9): p. 1478.

430

431

432

433

434

435 **Table 1:** Primary amplification primer sequences for various SNPs and their expected amplicon  
 436 sizes

| SNP ID* | Forward primer sequence (5'-3')** | Reverse primer sequence (5'-3')** | Amplicon length (bp) |
|---------|-----------------------------------|-----------------------------------|----------------------|
| arcC162 | GTTGGGTTATCAAATCGTGG              | ATAGTGATAGAACTGTAGGC              | 96                   |
| arcC210 | GAGTCTGGCTGTTCTTTTTG              | GATAAAGATGATCCACGATTC             | 118                  |
| aroE132 | GGCTTTAATATCACAATTCC              | GCACCTGCATTAATCGCTTG              | 103                  |
| aroE252 | TCTGGATAAACGCTGTGCAA              | AAGATGGCAAGTGGATAGGG              | 93                   |
| gmk129  | AACTAGGGATGCGTTTGAAG              | GGTGTACCATAATAGTTGCC              | 104                  |
| pta294  | GATTAGTAAGTGGTGCAGCG              | CCAGATGTTTTTGTAAACGCC             | 114                  |
| tpi36   | ATTCCACGAAACAGATGAAG              | ACGCTCTTCGTCTGTTTCAC              | 120                  |
| tpi241  | ATGAGCCAATCTGGGCAATC              | GTTTGACGTACAAATGCACAC             | 102                  |
| tpi243  | TGAACCAATCTGGGCAATCG              | GTTTGACGTACAAATGCACAC             | 101                  |
| yqil333 | CAACCATTGATTGATGTCCC              | GGCGGTATGGAGAATATGTC              | 105                  |

437

438 \***arcC**: Carbamate kinase, **aroE**: Shikimate dehydrogenase, **gmk**: Guanylate kinase, **pta**:  
 439 Phosphate acetyl transferase, **tpi**: Triosephosphate isomerase, **yqil**: Acetyl co-enzyme A acetyl  
 440 transferase. \*\* All amplification primers had a 5' 10-mer tag.

441 **Table 2:** Allele-specific extension primer sequences and expected masses for various SNP  
 442 alleles

| SNP ID  | Alleles | Unextended primer (UEP) sequence (5'-3')* | UEP mass | Call 1 | Mass 1 (Da) | Call 2 | Mass 2 (Da) |
|---------|---------|-------------------------------------------|----------|--------|-------------|--------|-------------|
| arcC162 | T/A     | CTGTAGGCACAATCGT                          | 4881.2   | A      | 5152.4      | T      | 5208.3      |
| arcC210 | C/T/A   | cTCCACGATTCAATAACCCAAC                    | 6592.3   | C      | 6839.5      | T      | 6919.4      |
| aroE132 | A/G     | agGATCTAAATACGGTATGATACG                  | 7424.9   | G      | 7672        | A      | 7752        |
| aroE252 | T/A     | ACAGATGGTATTGGTTATGT                      | 6202     | A      | 6473.3      | T      | 6529.1      |
| gmk129  | C/T     | CAGCATATTCTATAAATTGGTCATCTTT              | 8527.6   | T      | 8798.8      | C      | 8814.8      |
| pta294  | A/C     | TGCTGGACGTACAGTATC                        | 5514.6   | C      | 5801.8      | A      | 5841.7      |
| tpi36   | C/T     | agCATTCCATGTTTGAAAATAGC                   | 7046.6   | T      | 7317.8      | C      | 7333.8      |
| tpi241  | G/A     | AATGCACACATTTTCATTTG                      | 5761.8   | G      | 6009        | A      | 6088.9      |
| tpi243  | A/G     | CAAATGCACACATTTTCATT                      | 5730.8   | G      | 5978        | A      | 6057.9      |
| yqil333 | C/T     | gctgGTCAACAACAGTCGCTT                     | 6406.2   | C      | 6653.4      | T      | 6733.3      |

443

444 \* The bases in lowercase are incorporated into the oligonucleotide sequences during primer  
445 design to prevent the extension products for various SNP alleles from being too close to each  
446 other in the mass spectrum.

447 **Table 3:** Summary of the 10 MLST SNPs analyzed by iPlex massARRAY

| SNP     | Polymorphism | SNP call rate <sup>a</sup> | Allele frequency <sup>b</sup> |
|---------|--------------|----------------------------|-------------------------------|
| arcC162 | T/A          | 98.3% (57/58)              | <b>T</b> 53% (30/57)          |
| arcC210 | C/T/A        | 86% (50/58)                | <b>T</b> 60% (30/50)          |
| aroE132 | A/G          | 91.3% (53/58)              | <b>A</b> 73.6% (39/53)        |
| aroE252 | T/A          | 86% (50/58)                | <b>T</b> 64% (32/50)          |
| gmk129  | C/T          | 84.5% (49/58)              | <b>C</b> 67.3% (33/49)        |
| tpi36   | C/T          | 81% (47/58)                | <b>C</b> 63.8% (30/47)        |
| tpi241  | G/A          | 86% (50/58)                | <b>G</b> 98% (49/50)          |
| tpi243  | A/G          | 94.8% (55/58)              | <b>G</b> 60% (33/55)          |
| yqil333 | C/T          | 89.7% (52/58)              | <b>T</b> 84.6% (44/52)        |
| pta294  | A/C          | - *                        | -*                            |

448

449 \* pta294 was identified in only one isolate and was excluded when generating SNP genotypes.

450 <sup>a</sup> **SNP call rate:** The proportion of isolates in which a given SNP was identified as a proportion  
451 of all isolates tested for that SNP. <sup>b</sup> **Allele frequency:** The number of isolates in which a given  
452 SNP allele was identified as a proportion of all isolates in which the SNP was identified.

453

454

455

456

457 **Table 4:** Regional distribution of *S. aureus* isolates by massARRAY SNP genotyping

| SNP genotype*         | Nairobi | Kericho | Kisumu | Total |
|-----------------------|---------|---------|--------|-------|
| ATACGGT               | 6       | 5       | 1      | 12    |
| TCGCGGT               | 3       | 1       |        | 4     |
| TCACGAT               | 1       | 2       |        | 3     |
| TTACGAT               | 1       |         | 6      | 7     |
| TCACGGT               |         | 1       |        | 1     |
| TTACGGT               |         | 1       |        | 1     |
| ATGTGGT               |         | 3       |        | 3     |
| TTATGAC               |         | 1       |        | 1     |
| TTACGAC               |         | 1       | 1      | 2     |
| TTGTGGT               |         | 1       | 1      | 2     |
| ATACGAT               |         |         | 4      | 4     |
| ACGTAGT               |         |         | 1      | 1     |
| TCATGAC               |         |         | 1      | 1     |
| TCACGGC               |         |         | 2      | 2     |
| Incomplete profiles** | 5       | 3       | 2      | 10    |
| <b>Total</b>          | 16      | 19      | 19     | 54    |

458

459 \*7- member SNP genotypes are in the order of **arcC162, arcC 210, aroE 132, gmk 129, tpi**  
 460 **241, tpi 243** and **yqil 333**. \*\*: Isolates in which at least one of the seven SNPs used for genotype  
 461 assignment was not identified were considered incomplete.

462 **Table 5:** A summary of comparisons between iplex massARRAY, *spa* and MLST typing

| SNP genotype | <i>spa</i> type | Sequence type |
|--------------|-----------------|---------------|
| ATACGGT      | t355            | ST152         |
| TCGCGGT      | t005            | ST22          |
| TTACGAT      | t064            | ST8           |
| TTACGAC      | t17841*         | ST121         |
| TTATGAC      | t189            | ST188         |
| ACGTAGT      | t007            | ST39          |

|         |               |              |
|---------|---------------|--------------|
| TCACGGT | **            | ST1925       |
| TCATGAC | t002          | ST5          |
| ATGTGGT | t318/t021     | ST30         |
| ATACGAT | t037/t2029    | ST241        |
| TTACGGT | t10499        | ST 2019      |
| TCACGGC | t3772/ t13194 | ST 25/ST80   |
| TTGTGGT | t314/ t272    | ST121/152    |
| TCACGAT | t084/ t131    | ST 15/ST1290 |

463

464 7-member SNP genotypes are in the order of **arcC162, arcC 210, aroE 132, gmk 129, tpi 241,**

465 **tpi 243 and yqil 333.** \* A novel *spa* type reported in this study \*\* An unassigned novel *spa*

466 repeat sequence

467 **Table 6:** Time-to-result analysis for *spa*, MLST and massARRAY typing methods for the

468 isolates after DNA extraction

| Step                        | <i>spa</i> typing |        | MLST typing |         |
|-----------------------------|-------------------|--------|-------------|---------|
|                             | Time              | Period | Time        | Period  |
| Amplification PCR           | 3 hrs             | 1 day  | 21 hrs      | 2 days  |
| Gel electrophoresis         | 2 hrs             |        | 7 hrs       | 1 day   |
| PCR amplicon clean up       | 2 hrs             |        | 14 hrs      | 2 days  |
| Sequencing PCR              | 3 hrs             | 1 day  | 21 hrs      | 4 days  |
| Pre-sequencing purification | 3 hrs             |        | 21 hrs      | 8 days  |
| Sequence fragment analysis  | 10 hrs            |        | 70 hrs      |         |
| Data analysis               | 7 hrs             | 1 day  | 30 hrs      | 3 days  |
| <b>Total time</b>           |                   | 3 days |             | 20 days |
| <b>iPlex massARRAY</b>      |                   |        |             |         |
| Step                        | Time              | Period |             |         |
| Amplification PCR           | 2.5hrs            | 1 day  |             |         |
| SAP treatment               | 0.75hrs           |        |             |         |
| iPlex PCR                   | 3 hrs             |        |             |         |
| Sample conditioning         | 1 hr              |        |             |         |



|                   |       |       |  |
|-------------------|-------|-------|--|
| Data acquisition  | 1 hr  |       |  |
| Data analysis     | 3 hrs |       |  |
| <b>Total time</b> |       | 1 day |  |

469

470

471
